# Supplementary material for: phangorn: phylogenetic analysis in R
Source: PubMed Central journal article supplement — Bioinformatics. 2010 Dec 17;27(4):592–3. doi: 10.1093/bioinformatics/btq706 (PMC3035803; doi:10.1093/bioinformatics/btq706), 2010-12-17
Supplement: supp_btq706_S1.pdf [file supp_btq706_S1.pdf]

## Comparison of accuracy and speed between phangorn and other phylogenetic packages

For the comparison of phangorn with other phylogenetic programs we used 50 nucleotide data sets (S2) and 50 amino acid data sets (S3). These data sets were previously used in a comparison of several versions of PhyML with RaxML and taken from phyml website (<http://www.atgc-montpellier.fr/phyml/benchmarks>) and come originally from treebase (<http://www.treebase.org>). The analysis was performed using the following programs:

- Paup4.0b10 (<http://paup.csit.fsu.edu/>)
- phyml 3.0 (<http://www.atgc-montpellier.fr/phyml>)
- phylip 3.69 (<http://evolution.genetics.washington.edu/phylip.html>)
- phangorn 1.2-0 (<http://cran.r-project.org/web/packages/phangorn/index.html>).

All simulations have been performed on a Toshiba notebook with Intel(R) Pentium(R) Dual CPU T3400 @ 2.16GHz.

### Maximum likelihood analysis

The accuracy and speed of the maximum likelihood algorithm in phangorn were compared with those in PhyML. To obtain comparable likelihood values for the two programs we optimized, for the trees estimated with phangorn, the edge length and parameters in PhyML again. However the topology of the trees was kept fixed.

We analyzed 50 nucleotide data sets using GTR +  $\Gamma(4)$  model and Nearest Neighbor Interchange (NNI) rearrangements. Both programs have a similar search strategy. The accuracy of both programs was therefore about equal - 24 times the (log-)likelihood for phangorn was higher 23 times lower than for PhyML. However phangorn was in generally faster (table 1).

We obtained similar results for the 50 protein data sets. We optimized each data set with WAG +  $\Gamma(4)$  model and NNI rearrangements. Again the accuracy was very similar, the trees from phangorn achieved 15 times higher, 13 times lower and about 22 times an log-likelihood that is about equal to PhyML (table 2).

### Maximum parsimony analysis

We made two separate analyses to compare speed and accuracy of maximum parsimony between phangorn and Paup\* and between phangorn and phylip. In phylogenetic analyses there is always a trade-off between accuracy and time, we adjusted therefore some of the standard parameters to limit the time of the simulation. For the parsimony analysis with Paup\* we used the command hsearch with the option nbest=1. The parsimony analysis with the phylip program dnaps used the default values except for the parameter V (Number of trees to save), which was reduced to 10 (from 10000). For both analyses the phangorn function pratchet using the default values and the random seed was

set 1 before each run.

The results of the comparison between phangorn and Paup\* are shown in table 3. Trees estimated with Paup\* contained in most cases a lower p-score (28 times lower, 10 times higher) and the computing time is up to 100 times faster in Paup\*.

In the phylib function dnapars gaps "-" are coded as a fifth base. There is the possibility to recode gaps "-" as unknown states "?" to make the analysis compatible with Paup\*. I have to thank Prof. Felsenstein for pointing out these differences to me. In phangorn one can easily define to user-defined character states, so we performed the same coding for gaps as in dnapars. In most cases trees obtained from phylib have a lower p-score (25 versus 12), but the runtime is higher than with phangorn.

## Summary

The phangorn will likely produce reasonable trees for up to about 100 taxa. For higher number of taxa more sophisticated tree rearrangements (SPR, TBR) would be necessary to find good topologies. This restriction is noticeable in the comparison of the parsimony scores as phylib or Paup\* have the more sophisticated algorithms. However phangorn is capable of coping with a high number of sites, restricted mainly by the memory.

All the scripts and trees generated during these study can be obtained on request from the author.

| Data set                        | Maximum likelihood - DNA |          |                |           |
|---------------------------------|--------------------------|----------|----------------|-----------|
|                                 | phangorn                 |          | phyML          |           |
|                                 | log-likelihood           | time     | log-likelihood | time      |
| nucleic_M2564_142x1130_2006.phy | -20435.79                | 1 m 53 s | -20445.45      | 18 m 39 s |
| nucleic_M2565_51x1951_2006.phy  | -14657.68                | 29 s     | -14659.42      | 3 m 56 s  |
| nucleic_M2566_73x918_2006.phy   | -12011.73                | 46 s     | -12000.74      | 6 m 20 s  |
| nucleic_M2567_64x1044_2006.phy  | -6790.84                 | 23 s     | -6790.68       | 2 m 3 s   |
| nucleic_M2572_191x990_2006.phy  | -3505.22                 | 39 s     | -3505.21       | 1 m 39 s  |
| nucleic_M2587_117x1910_2006.phy | -16445.61                | 4 m 15 s | -16135.63      | 21 m 36 s |
| nucleic_M2588_68x1196_2006.phy  | -12012.42                | 1 m 52 s | -12011.10      | 8 m 31 s  |
| nucleic_M2599_66x1137_2006.phy  | -2163.06                 | 5 s      | -2162.58       | 14 s      |
| nucleic_M2600_69x814_2006.phy   | -1752.90                 | 5 s      | -1755.93       | 11 s      |
| nucleic_M2606_110x1206_2006.phy | -26860.34                | 1 m 46 s | -26860.91      | 12 m 46 s |
| nucleic_M2623_139x1044_2006.phy | -46073.80                | 6 m 26 s | -45981.42      | 20 m 2 s  |
| nucleic_M2627_54x1915_2006.phy  | -35136.54                | 1 m 20 s | -35136.55      | 14 m 31 s |
| nucleic_M2655_50x872_2006.phy   | -6516.99                 | 17 s     | -6516.99       | 2 m 7 s   |
| nucleic_M2661_66x1027_2006.phy  | -9130.70                 | 26 s     | -9130.12       | 2 m 51 s  |
| nucleic_M2662_60x1348_2006.phy  | -12344.62                | 48 s     | -12346.63      | 4 m 42 s  |
| nucleic_M2675_51x1537_2006.phy  | -7878.35                 | 21 s     | -7879.82       | 2 m 20 s  |
| nucleic_M2696_50x1472_2006.phy  | -6165.37                 | 21 s     | -6169.76       | 1 m 25 s  |
| nucleic_M2702_54x886_2006.phy   | -5387.25                 | 20 s     | -5384.91       | 2 m 4 s   |
| nucleic_M2707_115x1677_2006.phy | -9765.34                 | 3 m 11 s | -9783.05       | 15 m 0 s  |
| nucleic_M2708_78x1107_2006.phy  | -6547.12                 | 52 s     | -6537.09       | 5 m 6 s   |
| nucleic_M2711_123x1181_2006.phy | -10651.89                | 1 m 30 s | -10665.85      | 7 m 28 s  |
| nucleic_M2716_79x1252_2006.phy  | -3372.43                 | 36 s     | -3362.93       | 2 m 12 s  |
| nucleic_M2733_60x1207_2006.phy  | -10920.00                | 43 s     | -10919.17      | 4 m 30 s  |
| nucleic_M2738_53x1538_2006.phy  | -13903.14                | 49 s     | -13903.14      | 8 m 9 s   |
| nucleic_M2752_106x1292_2006.phy | -7871.28                 | 36 s     | -7870.17       | 2 m 32 s  |
| nucleic_M2764_57x803_2006.phy   | -10150.01                | 36 s     | -10150.01      | 3 m 21 s  |
| nucleic_M2770_86x1628_2006.phy  | -5814.35                 | 42 s     | -5822.55       | 2 m 15 s  |
| nucleic_M2771_52x1896_2006.phy  | -13981.66                | 34 s     | -13983.47      | 6 m 17 s  |
| nucleic_M2772_77x900_2006.phy   | -7194.07                 | 54 s     | -7197.32       | 4 m 0 s   |
| nucleic_M2786_104x1051_2006.phy | -15657.01                | 1 m 16 s | -15667.87      | 8 m 18 s  |
| nucleic_M2792_166x812_2006.phy  | -10593.95                | 2 m 18 s | -10566.66      | 7 m 26 s  |
| nucleic_M2826_60x1398_2006.phy  | -14342.13                | 38 s     | -14352.24      | 4 m 9 s   |
| nucleic_M2845_68x1715_2006.phy  | -11375.41                | 37 s     | -11360.22      | 3 m 34 s  |
| nucleic_M2856_61x970_2006.phy   | -25037.08                | 49 s     | -25032.81      | 7 m 58 s  |
| nucleic_M2862_54x1011_2006.phy  | -16196.69                | 44 s     | -16199.25      | 6 m 42 s  |
| nucleic_M2879_70x800_2006.phy   | -5789.28                 | 49 s     | -5788.49       | 2 m 28 s  |
| nucleic_M2901_56x1802_2006.phy  | -7839.45                 | 1 m 1 s  | -7867.90       | 3 m 56 s  |
| nucleic_M2902_51x908_2006.phy   | -7593.51                 | 27 s     | -7589.85       | 2 m 7 s   |
| nucleic_M2913_81x897_2006.phy   | -2433.31                 | 37 s     | -2435.08       | 1 m 53 s  |
| nucleic_M2916_143x897_2006.phy  | -3491.37                 | 1 m 9 s  | -3491.26       | 5 m 38 s  |
| nucleic_M2921_54x966_2006.phy   | -6443.45                 | 18 s     | -6438.54       | 2 m 2 s   |
| nucleic_M2922_77x1101_2006.phy  | -3044.21                 | 18 s     | -3036.46       | 1 m 3 s   |
| nucleic_M2928_81x1651_2006.phy  | -6688.41                 | 41 s     | -6688.42       | 2 m 17 s  |
| nucleic_M2932_68x1712_2006.phy  | -14923.29                | 1 m 17 s | -14923.65      | 16 m 51 s |
| nucleic_M2933_99x1634_2006.phy  | -7628.64                 | 1 m 27 s | -7647.42       | 10 m 4 s  |
| nucleic_M2944_80x1495_2006.phy  | -8985.80                 | 29 s     | -9011.54       | 3 m 38 s  |
| nucleic_M2945_62x1271_2006.phy  | -34980.46                | 1 m 30 s | -34987.79      | 9 m 8 s   |
| nucleic_M2946_110x1003_2006.phy | -17018.87                | 1 m 37 s | -17006.52      | 16 m 17 s |
| nucleic_M2974_56x827_2006.phy   | -5383.47                 | 16 s     | -5382.99       | 1 m 41 s  |
| nucleic_M2975_93x982_2006.phy   | -12304.88                | 1 m 24 s | -12302.69      | 6 m 45 s  |

Table 1: Comparison of (log-)likelihood and speed for the analysis of a GTR +  $\Gamma(4)$  model on 50 nucleotide data sets between phangorn and phymml

| Data set                       | Maximum likelihood - AA |           |                |           |
|--------------------------------|-------------------------|-----------|----------------|-----------|
|                                | phangorn                |           | phyML          |           |
|                                | log-likelihood          | time      | log-likelihood | time      |
| proteic_M1372_23x394_2003.phy  | -4474.49                | 17 s      | -4474.49       | 58 s      |
| proteic_M1373_23x392_2003.phy  | -3535.88                | 16 s      | -3539.49       | 37 s      |
| proteic_M1375_23x530_2003.phy  | -7769.71                | 23 s      | -7789.80       | 1 m 39 s  |
| proteic_M1376_36x484_2003.phy  | -11531.09               | 39 s      | -11531.23      | 3 m 17 s  |
| proteic_M1377_19x1566_2003.phy | -17597.22               | 1 m 16 s  | -17576.09      | 3 m 51 s  |
| proteic_M1378_18x1561_2003.phy | -16060.74               | 55 s      | -16045.65      | 3 m 2 s   |
| proteic_M1379_9x1557_2003.phy  | -11634.54               | 9 s       | -11634.54      | 38 s      |
| proteic_M1380_9x1558_2003.phy  | -12023.40               | 11 s      | -12023.40      | 36 s      |
| proteic_M1381_9x1557_2003.phy  | -12099.21               | 9 s       | -12099.21      | 34 s      |
| proteic_M1382_9x1560_2003.phy  | -12335.18               | 12 s      | -12335.18      | 37 s      |
| proteic_M1383_11x1561_2003.phy | -13724.27               | 16 s      | -13730.12      | 58 s      |
| proteic_M1384_11x391_2003.phy  | -2884.86                | 3 s       | -2882.79       | 12 s      |
| proteic_M1385_11x530_2003.phy  | -5615.96                | 5 s       | -5609.47       | 25 s      |
| proteic_M1392_57x430_2003.phy  | -8178.97                | 2 m 30 s  | -8174.61       | 4 m 29 s  |
| proteic_M1487_52x981_2003.phy  | -16320.68               | 3 m 49 s  | -16291.04      | 7 m 36 s  |
| proteic_M1499_22x513_2003.phy  | -12471.64               | 11 s      | -12471.64      | 1 m 39 s  |
| proteic_M1503_23x479_2003.phy  | -9851.03                | 22 s      | -9851.03       | 1 m 41 s  |
| proteic_M1504_37x547_2003.phy  | -12585.53               | 29 s      | -12585.53      | 3 m 46 s  |
| proteic_M1508_22x431_2003.phy  | -3155.15                | 9 s       | -3155.09       | 40 s      |
| proteic_M1601_36x340_2003.phy  | -6918.85                | 47 s      | -6921.32       | 2 m 1 s   |
| proteic_M1768_31x228_2004.phy  | -1052.53                | 6 s       | -1052.53       | 14 s      |
| proteic_M1812_34x176_2004.phy  | -5420.53                | 16 s      | -5420.53       | 57 s      |
| proteic_M1882_8x705_2004.phy   | -6191.99                | 7 s       | -6191.99       | 1 m 5 s   |
| proteic_M1989_18x173_2004.phy  | -3179.90                | 10 s      | -3179.90       | 28 s      |
| proteic_M1990_35x153_2004.phy  | -1454.33                | 13 s      | -1454.26       | 55 s      |
| proteic_M1991_32x129_2004.phy  | -2393.89                | 21 s      | -2394.11       | 47 s      |
| proteic_M1992_46x68_2004.phy   | -2922.82                | 19 s      | -2921.40       | 48 s      |
| proteic_M1993_28x93_2004.phy   | -2007.73                | 13 s      | -2005.49       | 25 s      |
| proteic_M2302_24x365_2005.phy  | -4204.53                | 13 s      | -4204.52       | 43 s      |
| proteic_M2304_31x429_2005.phy  | -5506.04                | 20 s      | -5506.04       | 1 m 17 s  |
| proteic_M2344_7x232_2005.phy   | -1583.46                | 1 s       | -1583.46       | 6 s       |
| proteic_M2345_7x232_2005.phy   | -1583.46                | 1 s       | -1583.46       | 6 s       |
| proteic_M2363_38x251_2004.phy  | -11713.42               | 1 m 34 s  | -11723.22      | 4 m 40 s  |
| proteic_M2382_28x162_2005.phy  | -2707.96                | 28 s      | -2712.46       | 43 s      |
| proteic_M2476_30x719_2005.phy  | -24548.58               | 42 s      | -24548.59      | 4 m 3 s   |
| proteic_M2477_39x888_2005.phy  | -21163.44               | 52 s      | -21163.44      | 4 m 48 s  |
| proteic_M2478_30x276_2005.phy  | -8725.38                | 32 s      | -8725.38       | 1 m 29 s  |
| proteic_M2479_30x627_2005.phy  | -18059.96               | 35 s      | -18059.96      | 3 m 50 s  |
| proteic_M2480_40x430_2005.phy  | -23899.13               | 1 m 2 s   | -23871.28      | 3 m 15 s  |
| proteic_M2512_14x717_2006.phy  | -20099.72               | 23 s      | -20102.12      | 5 m 44 s  |
| proteic_M2558_27x1060_2005.phy | -37185.91               | 2 m 23 s  | -37186.25      | 12 m 20 s |
| proteic_M2624_139x348_2006.phy | -13086.63               | 11 m 34 s | -13142.76      | 56 m 47 s |
| proteic_M2636_20x1275_2006.phy | -19066.77               | 50 s      | -19066.77      | 2 m 13 s  |
| proteic_M2637_19x380_2006.phy  | -1604.55                | 4 s       | -1606.52       | 26 s      |
| proteic_M2638_18x378_2006.phy  | -1691.49                | 2 s       | -1693.32       | 13 s      |
| proteic_M2639_19x331_2006.phy  | -5745.68                | 10 s      | -5743.37       | 48 s      |
| proteic_M2640_18x243_2006.phy  | -2510.77                | 3 s       | -2510.77       | 23 s      |
| proteic_M2641_18x326_2006.phy  | -5153.58                | 10 s      | -5153.58       | 48 s      |
| proteic_M2899_25x444_2006.phy  | -9961.38                | 29 s      | -9960.55       | 1 m 44 s  |
| proteic_M2954_5x1006_2006.phy  | -3241.74                | < 1 s     | -3241.74       | 3 s       |

Table 2: Comparison of (log-)likelihood and speed for the analysis of a GTR +  $\Gamma(4)$  model on 50 protein data sets between phangorn and PhyML

| Data set                        | Maximum Parsimony - DNA |             |         |             |
|---------------------------------|-------------------------|-------------|---------|-------------|
|                                 | phangorn                |             | Paup    |             |
|                                 | p-score                 | time (sec.) | p-score | time (sec.) |
| nucleic_M2564_142x1130_2006.phy | 4021                    | 19.92       | 4006    | 0.61        |
| nucleic_M2565_51x1951_2006.phy  | 2390                    | 5.18        | 2392    | 0.05        |
| nucleic_M2566_73x918_2006.phy   | 2300                    | 6.49        | 2301    | 0.16        |
| nucleic_M2567_64x1044_2006.phy  | 955                     | 4.24        | 956     | 0.05        |
| nucleic_M2572_191x990_2006.phy  | 367                     | 6.96        | 367     | 0.23        |
| nucleic_M2587_117x1910_2006.phy | 2544                    | 16.38       | 2398    | 0.59        |
| nucleic_M2588_68x1196_2006.phy  | 2683                    | 6.33        | 2669    | 0.16        |
| nucleic_M2599_66x1137_2006.phy  | 80                      | 1.64        | 80      | 0.02        |
| nucleic_M2600_69x814_2006.phy   | 88                      | 1.71        | 88      | 0.03        |
| nucleic_M2606_110x1206_2006.phy | 5768                    | 14.32       | 5769    | 0.28        |
| nucleic_M2623_139x1044_2006.phy | 11905                   | 31.65       | 11665   | 1.87        |
| nucleic_M2627_54x1915_2006.phy  | 8231                    | 8.82        | 8231    | 0.16        |
| nucleic_M2655_50x872_2006.phy   | 1104                    | 3.03        | 1103    | 0.03        |
| nucleic_M2661_66x1027_2006.phy  | 1835                    | 5.3         | 1829    | 0.08        |
| nucleic_M2662_60x1348_2006.phy  | 2204                    | 6.86        | 2192    | 0.08        |
| nucleic_M2675_51x1537_2006.phy  | 1194                    | 3.62        | 1189    | 0.02        |
| nucleic_M2696_50x1472_2006.phy  | 696                     | 3.28        | 687     | 0.01        |
| nucleic_M2702_54x886_2006.phy   | 846                     | 3.15        | 846     | 0.06        |
| nucleic_M2707_115x1677_2006.phy | 1788                    | 10.34       | 1762    | 0.37        |
| nucleic_M2708_78x1107_2006.phy  | 1250                    | 5.7         | 1235    | 0.13        |
| nucleic_M2711_123x1181_2006.phy | 1983                    | 12.2        | 1983    | 0.23        |
| nucleic_M2716_79x1252_2006.phy  | 358                     | 2.64        | 333     | 0.17        |
| nucleic_M2733_60x1207_2006.phy  | 1931                    | 5.99        | 1935    | 0.05        |
| nucleic_M2738_53x1538_2006.phy  | 2596                    | 4.7         | 2596    | 0.08        |
| nucleic_M2752_106x1292_2006.phy | 1002                    | 5.09        | 1003    | 0.09        |
| nucleic_M2764_57x803_2006.phy   | 1936                    | 4.66        | 1936    | 0.09        |
| nucleic_M2770_86x1628_2006.phy  | 512                     | 5.96        | 508     | 0.06        |
| nucleic_M2771_52x1896_2006.phy  | 2299                    | 6.67        | 2299    | 0.08        |
| nucleic_M2772_77x900_2006.phy   | 1206                    | 8.03        | 1204    | 0.13        |
| nucleic_M2786_104x1051_2006.phy | 3189                    | 10.85       | 3190    | 0.27        |
| nucleic_M2792_166x812_2006.phy  | 1880                    | 16.32       | 1879    | 0.36        |
| nucleic_M2826_60x1398_2006.phy  | 2538                    | 6.27        | 2531    | 0.09        |
| nucleic_M2845_68x1715_2006.phy  | 1588                    | 6.65        | 1588    | 0.08        |
| nucleic_M2856_61x970_2006.phy   | 6298                    | 7.96        | 6304    | 0.09        |
| nucleic_M2862_54x1011_2006.phy  | 3932                    | 5.07        | 3938    | 0.05        |
| nucleic_M2879_70x800_2006.phy   | 875                     | 4.04        | 875     | 0.05        |
| nucleic_M2901_56x1802_2006.phy  | 925                     | 4.35        | 907     | 0.08        |
| nucleic_M2902_51x908_2006.phy   | 1341                    | 4.6         | 1340    | 0.05        |
| nucleic_M2913_81x897_2006.phy   | 218                     | 2.37        | 211     | 0.14        |
| nucleic_M2916_143x897_2006.phy  | 351                     | 5.99        | 341     | 0.48        |
| nucleic_M2921_54x966_2006.phy   | 1004                    | 4.03        | 1003    | 0.03        |
| nucleic_M2922_77x1101_2006.phy  | 282                     | 2.34        | 280     | 0.01        |
| nucleic_M2928_81x1651_2006.phy  | 882                     | 4.87        | 882     | 0.05        |
| nucleic_M2932_68x1712_2006.phy  | 3186                    | 8.68        | 3175    | 0.25        |
| nucleic_M2933_99x1634_2006.phy  | 1096                    | 8.48        | 1087    | 0.20        |
| nucleic_M2944_80x1495_2006.phy  | 1237                    | 6.02        | 1235    | 0.06        |
| nucleic_M2945_62x1271_2006.phy  | 9252                    | 10.5        | 9253    | 0.20        |
| nucleic_M2946_110x1003_2006.phy | 3461                    | 13.09       | 3457    | 0.58        |
| nucleic_M2974_56x827_2006.phy   | 864                     | 3.1         | 862     | 0.03        |
| nucleic_M2975_93x982_2006.phy   | 2345                    | 11.3        | 2333    | 0.22        |

Table 3: Comparison of parsimony scores and speed between phangorn and Paup\* on 50 nucleotide data sets

| Data set                        | Maximum Parsimony - DNA |             |         |             |
|---------------------------------|-------------------------|-------------|---------|-------------|
|                                 | phangorn                |             | phylip  |             |
|                                 | p-score                 | time (sec.) | p-score | time (sec.) |
| nucleic_M2564_142x1130_2006.phy | 4573                    | 21.05       | 4558    | 420.36      |
| nucleic_M2565_51x1951_2006.phy  | 2835                    | 6.58        | 2835    | 10.97       |
| nucleic_M2566_73x918_2006.phy   | 2661                    | 6.66        | 2664    | 52.88       |
| nucleic_M2567_64x1044_2006.phy  | 994                     | 4.52        | 994     | 24.82       |
| nucleic_M2572_191x990_2006.phy  | 710                     | 7.43        | 710     | 22.2        |
| nucleic_M2587_117x1910_2006.phy | 7552                    | 19.92       | 7496    | 348.88      |
| nucleic_M2588_68x1196_2006.phy  | 3042                    | 7.02        | 2967    | 46.23       |
| nucleic_M2599_66x1137_2006.phy  | 391                     | 1.8         | 391     | 3.1         |
| nucleic_M2600_69x814_2006.phy   | 96                      | 1.62        | 96      | 2.42        |
| nucleic_M2606_110x1206_2006.phy | 5768                    | 15.7        | 5768    | 205.22      |
| nucleic_M2623_139x1044_2006.phy | 16911                   | 26.38       | 16941   | 239.45      |
| nucleic_M2627_54x1915_2006.phy  | 8795                    | 9.04        | 8795    | 36.51       |
| nucleic_M2655_50x872_2006.phy   | 1256                    | 3.41        | 1256    | 4.76        |
| nucleic_M2661_66x1027_2006.phy  | 2418                    | 5.91        | 2418    | 10.77       |
| nucleic_M2662_60x1348_2006.phy  | 2612                    | 6.11        | 2596    | 16.3        |
| nucleic_M2675_51x1537_2006.phy  | 1735                    | 3.86        | 1737    | 12.16       |
| nucleic_M2696_50x1472_2006.phy  | 1991                    | 3.49        | 1994    | 24.73       |
| nucleic_M2702_54x886_2006.phy   | 1061                    | 4.26        | 1060    | 16.53       |
| nucleic_M2707_115x1677_2006.phy | 4047                    | 12.7        | 4020    | 196.26      |
| nucleic_M2708_78x1107_2006.phy  | 2747                    | 7.86        | 2751    | 59.11       |
| nucleic_M2711_123x1181_2006.phy | 3672                    | 13.54       | 3681    | 178.15      |
| nucleic_M2716_79x1252_2006.phy  | 2145                    | 4.25        | 2131    | 16.63       |
| nucleic_M2733_60x1207_2006.phy  | 1931                    | 6.27        | 1933    | 29.93       |
| nucleic_M2738_53x1538_2006.phy  | 3034                    | 5.1         | 3034    | 16.08       |
| nucleic_M2752_106x1292_2006.phy | 1141                    | 5.91        | 1141    | 64.13       |
| nucleic_M2764_57x803_2006.phy   | 4077                    | 6.52        | 4066    | 13.24       |
| nucleic_M2770_86x1628_2006.phy  | 2227                    | 5.33        | 2219    | 56.83       |
| nucleic_M2771_52x1896_2006.phy  | 3960                    | 5.74        | 3921    | 21.32       |
| nucleic_M2772_77x900_2006.phy   | 3528                    | 7.24        | 3525    | 37.71       |
| nucleic_M2786_104x1051_2006.phy | 6410                    | 10.88       | 6409    | 185.02      |
| nucleic_M2792_166x812_2006.phy  | 2573                    | 17.52       | 2554    | 248.46      |
| nucleic_M2826_60x1398_2006.phy  | 2538                    | 6.59        | 2530    | 49.5        |
| nucleic_M2845_68x1715_2006.phy  | 2102                    | 7.64        | 2089    | 59.55       |
| nucleic_M2856_61x970_2006.phy   | 6622                    | 7.39        | 6623    | 12.28       |
| nucleic_M2862_54x1011_2006.phy  | 3932                    | 5.29        | 3937    | 20.03       |
| nucleic_M2879_70x800_2006.phy   | 1861                    | 4.57        | 1845    | 24.6        |
| nucleic_M2901_56x1802_2006.phy  | 925                     | 4.59        | 908     | 34.55       |
| nucleic_M2902_51x908_2006.phy   | 1341                    | 4.84        | 1336    | 16.44       |
| nucleic_M2913_81x897_2006.phy   | 332                     | 2.45        | 325     | 10.41       |
| nucleic_M2916_143x897_2006.phy  | 493                     | 5.79        | 486     | 49.96       |
| nucleic_M2921_54x966_2006.phy   | 1548                    | 4.45        | 1548    | 18.49       |
| nucleic_M2922_77x1101_2006.phy  | 587                     | 2.65        | 584     | 6.68        |
| nucleic_M2928_81x1651_2006.phy  | 889                     | 5.12        | 889     | 15.97       |
| nucleic_M2932_68x1712_2006.phy  | 8632                    | 8.77        | 8588    | 66.01       |
| nucleic_M2933_99x1634_2006.phy  | 3932                    | 8.28        | 3888    | 75.61       |
| nucleic_M2944_80x1495_2006.phy  | 1788                    | 6.95        | 1784    | 59.19       |
| nucleic_M2945_62x1271_2006.phy  | 10252                   | 8.8         | 10243   | 23.43       |
| nucleic_M2946_110x1003_2006.phy | 4082                    | 14.41       | 4085    | 148.76      |
| nucleic_M2974_56x827_2006.phy   | 1653                    | 3.88        | 1654    | 9.66        |
| nucleic_M2975_93x982_2006.phy   | 6725                    | 11.17       | 6686    | 67.55       |

Table 4: Comparison of parsimony scores and speed between phangorn and phylic on 50 nucleotide data sets
